# Supplementary material
Source: publisher figshare collection journal article supplement (https://frontiersin.figshare.com/ndownloader/files/24100046)
Supplement: Supplementary file [file 24100046]

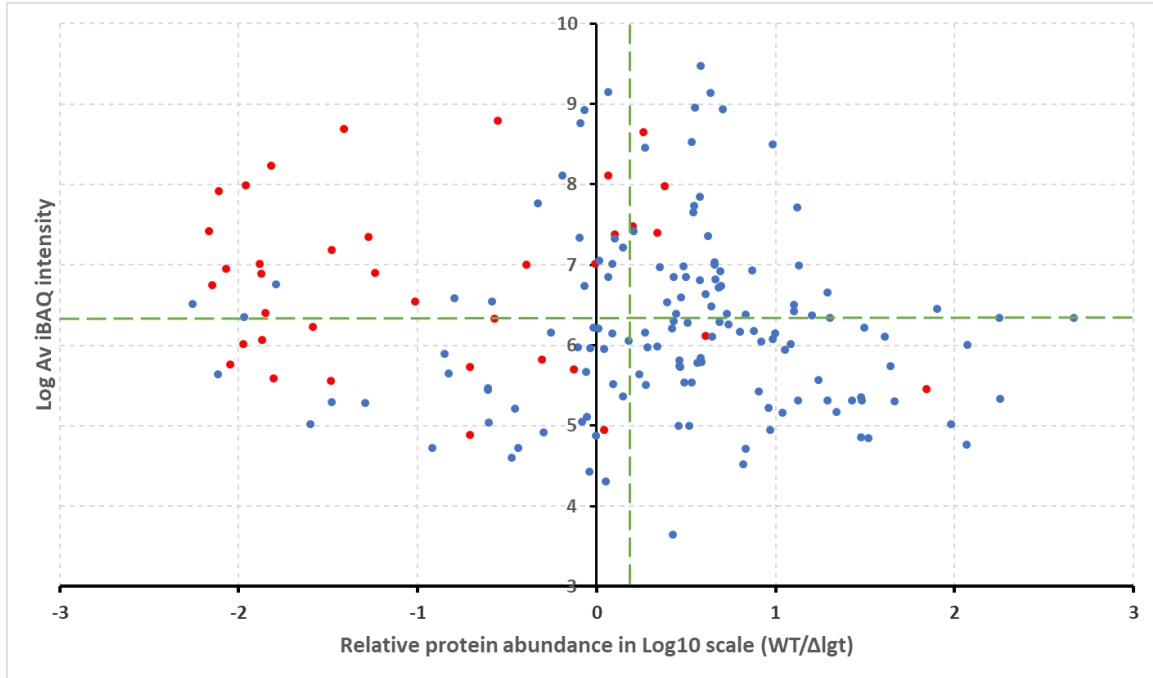

Figure S1. Relative abundance of secreted proteins in *L. plantarum* WCFS1 wild type and the *lgt* deletion strain ( $\Delta lgt$ ; NZ3565Cm). The relative abundance was the ratio taken from the label free quantitation (LFQ,  $\log_{10}$  value) of detected proteins in wild type and the deletion strain in tandem mass spectrometry (MS/MS) analysis. The Av iBAQ intensity represents average Intensity-based absolute quantification of the protein detected in WT and  $\Delta lgt$ . The red dots represent lipoproteins, whereas blue dots represent all other type of proteins, average LFQ ratio and LogAv-iBAQ values are indicated by vertical and horizontal green dashed lines, respectively.

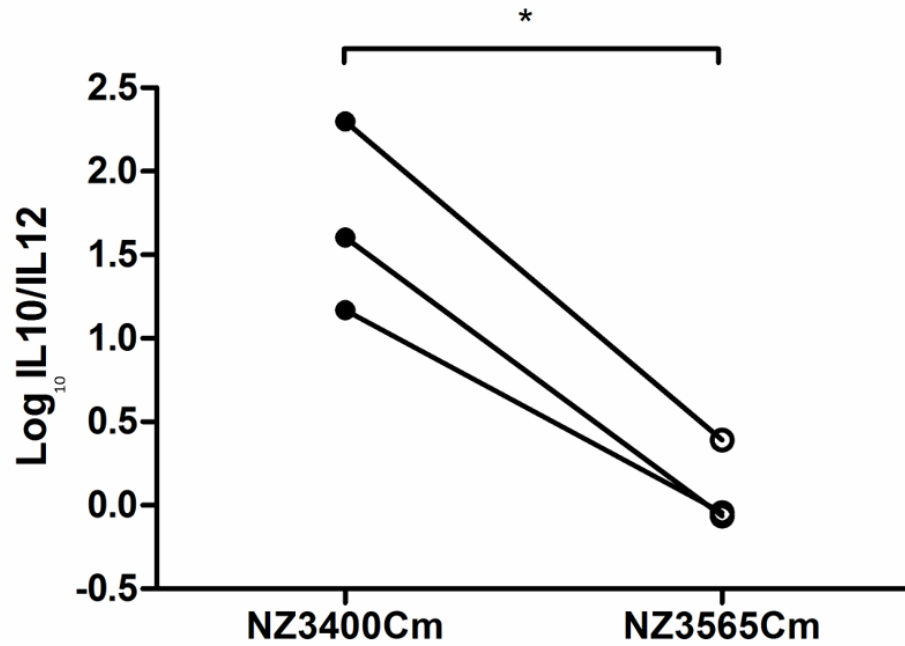

Figure S2. IL10/IL12 cytokine ratio (presented as  $\log_{10}$  values) elicited by *L. plantarum* NZ3400Cm and the *lgt* deletion strain NZ3565Cm ( $\Delta lgt$ ; NZ3565Cm) following co-incubation with PBMC. The cytokine levels for individual donors stimulated with the strains were connected by a line to focus the read-outs on intrapersonal changes elicited by the deletion. The differences of IL10/IL12 ratio between NZ3400Cm and NZ3565Cm were statistically analyzed using paired t test; \*,  $P \leq 0.05$ .

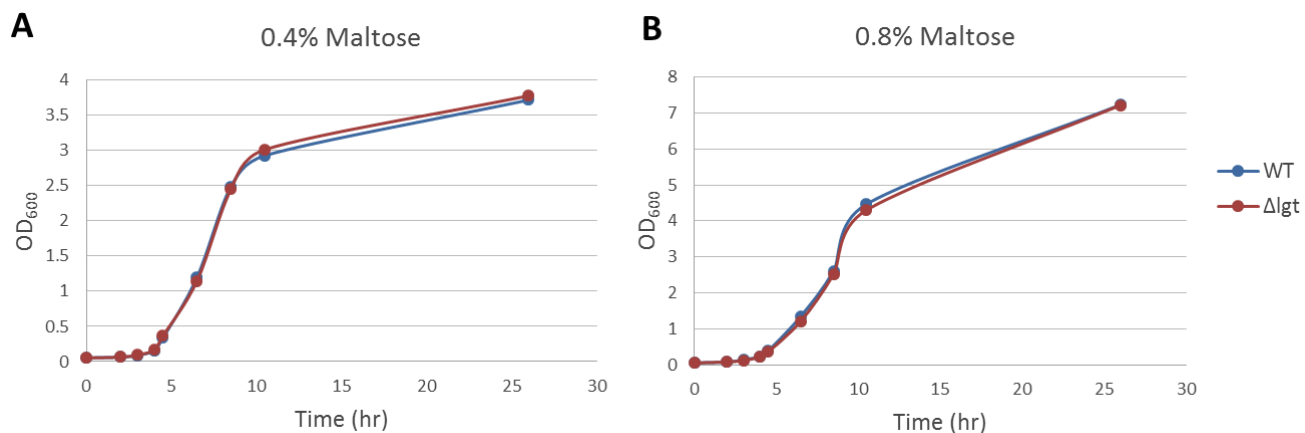

Figure S3. Comparison of the growth curves of *L. plantarum* NZ3400Cm and the *lgt* deletion strain (Δ*lgt*; NZ3565Cm). Bacteria were cultured in chemical defined medium with 0.4% (A) or 0.8% (B) maltose as a sole carbon source at 37° C. The growth was monitored for 26 hour by measuring the absorbance at 600 nm (OD<sub>600</sub>).

Table S1. Proteins detected in mass spectrometry with different abundances between wild type *L. plantarum* WCFS1 and  $\Delta lgt$  mutant

| Gene ID                                              | Relative abundance (WT/ $\Delta lgt$ ) <sup>a</sup> | Function                                                                     | LocateP Subcellular Localization Prediction | Mol. weight [kDa] |
|------------------------------------------------------|-----------------------------------------------------|------------------------------------------------------------------------------|---------------------------------------------|-------------------|
| <b>Only detected in <math>\Delta lgt</math></b>      |                                                     |                                                                              |                                             |                   |
| <i>lp_0200</i>                                       | -                                                   | ABC transporter, substrate binding protein                                   | Lipid anchored                              | 61.0              |
| <i>lp_0929</i>                                       | -                                                   | alkaline shock protein                                                       | Intracellular                               | 15.8              |
| <i>lp_0937</i>                                       | -                                                   | membrane alanine aminopeptidase (aminopeptidase N)                           | Intracellular                               | 93.9              |
| <i>lp_1539</i>                                       | -                                                   | lipoprotein precursor                                                        | Lipid anchored                              | 21.1              |
| <i>lp_2974</i>                                       | -                                                   | ABC transporter, substrate binding protein                                   | Lipid anchored                              | 33.8              |
| <i>lp_3018</i>                                       | -                                                   | ABC transporter substrate binding protein                                    | Lipid anchored                              | 32.9              |
| <i>lp_3302</i>                                       | -                                                   | ABC transporter substrate binding protein                                    | Lipid anchored                              | 33.9              |
| <i>lp_3352</i>                                       | -                                                   | small heat shock protein                                                     | Intracellular                               | 16.7              |
| <i>lp_3642</i>                                       | -                                                   | ABC transporter, substrate binding protein, mannose related oligosaccharides | Lipid anchored                              | 54.1              |
| <b>At least 2x higher in <math>\Delta lgt</math></b> |                                                     |                                                                              |                                             |                   |
| <i>lp_0018</i>                                       | 0.013                                               | ABC transporter, substrate binding protein, oligopeptide                     | Lipid anchored                              | 59.7              |
| <i>lp_0175</i>                                       | 0.053                                               | ABC transporter, substrate binding protein, maltodextrin                     | Lipid anchored                              | 45.7              |
| <i>lp_0200</i>                                       | 0.026                                               | ABC transporter, substrate binding protein                                   | Lipid anchored                              | 61.0              |
| <i>lp_0201</i>                                       | 0.008                                               | ABC transporter, substrate binding proteins                                  | Lipid anchored                              | 61.1              |
| <i>lp_0733</i>                                       | 0.033                                               | phosphate ABC transporter, substrate binding protein                         | Lipid anchored                              | 31.5              |
| <i>lp_0783</i>                                       | 0.096                                               | ABC transporter, substrate binding protein                                   | Lipid anchored                              | 61.1              |
| <i>lp_1010</i>                                       | 0.281                                               | serine-type D-Ala-D-Ala carboxypeptidase                                     | Lipid anchored                              | 33.0              |
| <i>lp_1070</i>                                       | 0.013                                               | lipoprotein precursor, FMN-binding protein                                   | Lipid anchored                              | 43.4              |
| <i>lp_1146</i>                                       | 0.262                                               | lipoprotein, pheromone precursor (putative)                                  | Lipid anchored                              | 108.0             |
| <i>lp_1452</i>                                       | 0.015                                               | peptidylprolyl isomerase                                                     | Lipid anchored                              | 32.6              |
| <i>lp_1473</i>                                       | 0.011                                               | iron chelatin ABC transporter, substrate binding protein (putative)          | Lipid anchored                              | 21.1              |
| <i>lp_2312</i>                                       | 0.195                                               | ABC transporter, substrate binding protein, histidine                        | Lipid anchored                              | 31.3              |
| <i>lp_2350</i>                                       | 0.008                                               | ABC transporter, substrate binding protein, D-Methionine -like precursor     | Lipid anchored                              | 29.9              |

|                |       |                                                                                              |                          |       |
|----------------|-------|----------------------------------------------------------------------------------------------|--------------------------|-------|
| <i>lp_2397</i> | 0.497 | prophage P2a protein 59; extracellular polysaccharide deacetylase, lipid-anchored (putative) | Lipid anchored           | 31.6  |
| <i>lp_2450</i> | 0.013 | prophage P2a protein 7; extracellular protein with lipoprotein anchor                        | Lipid anchored           | 12.0  |
| <i>lp_2519</i> | 0.009 | cell surface hydrolase, DUF915 family, membrane-bound (putative)                             | Lipid anchored           | 31.7  |
| <i>lp_2906</i> | 0.407 | DNA-entry nuclease                                                                           | Lipid anchored           | 34.3  |
| <i>lp_2974</i> | 0.016 | ABC transporter, substrate binding protein                                                   | Lipid anchored           | 33.8  |
| <i>lp_2985</i> | 0.026 | branched-chain amino acid ABC transporter, substrate binding protein                         | Lipid anchored           | 41.9  |
| <i>lp_3018</i> | 0.013 | ABC transporter substrate binding protein                                                    | Lipid anchored           | 32.9  |
| <i>lp_3103</i> | 0.033 | iron chelatin ABC transporter, substrate binding protein                                     | Lipid anchored           | 34.1  |
| <i>lp_3209</i> | 0.011 | ABC transporter, substrate binding protein, cystine                                          | Lipid anchored           | 29.0  |
| <i>lp_3214</i> | 0.007 | ABC transporter, substrate binding protein, cystathionine (putative)                         | Lipid anchored           | 29.3  |
| <i>lp_3302</i> | 0.068 | ABC transporter substrate binding protein                                                    | Lipid anchored           | 33.9  |
| <i>lp_3642</i> | 0.053 | ABC transporter, substrate binding protein, mannose related oligosaccharides                 | Lipid anchored           | 54.1  |
| <i>lp_0076</i> | 0.246 | elongation factor G                                                                          | Intracellular            | 77.0  |
| <i>lp_0764</i> | 0.336 | Phosphoglucomutase                                                                           | Intracellular            | 63.5  |
| <i>lp_0929</i> | 0.053 | alkaline shock protein                                                                       | Intracellular            | 93.9  |
| <i>lp_1046</i> | 0.472 | ribosomal protein L24                                                                        | Intracellular            | 11.4  |
| <i>lp_1879</i> | 0.246 | DNA-binding protein                                                                          | Intracellular            | 62.9  |
| <i>lp_3352</i> | 0.350 | small heat shock protein                                                                     | Intracellular            | 16.7  |
| <i>lp_1229</i> | 0.039 | mannose-specific adhesion                                                                    | LPxTG Cell-wall anchored | 60.3  |
| <i>lp_0295</i> | 0.160 | transport protein, MMPL family                                                               | Multi-transmembrane      | 143.3 |
| <i>lp_0925</i> | 0.149 | Acyltransferase                                                                              | Multi-transmembrane      | 15.8  |
| <i>lp_1000</i> | 0.014 | transcriptional attenuator, cell envelope-related, LytR family                               | N-terminally anchored    | 28.2  |
| <i>lp_1097</i> | 0.269 | manganese/zinc ABC transporter, substrate binding protein                                    | Secretory(released)      | 42.6  |
| <i>lp_1278</i> | 0.058 | serine-type D-Ala-D-Ala carboxypeptidase                                                     | Secretory(released)      | 38.6  |

---

| Only detected in WT      |        |                                                             |                       |       |
|--------------------------|--------|-------------------------------------------------------------|-----------------------|-------|
| <i>lp_0542</i>           | -      | septum formation initiator                                  | N-terminally anchored | 15.2  |
| <i>lp_0575</i>           | -      | mannose PTS, EIIAB                                          | Intracellular         | 35.3  |
| <i>lp_1043</i>           | -      | ribosomal protein L29                                       | Intracellular         | 7.5   |
| <i>lp_1050</i>           | -      | ribosomal protein S8                                        | Intracellular         | 14.6  |
| <i>lp_1097</i>           | -      | manganese/zinc ABC transporter, substrate binding protein   | Secretory(released)   | 34.6  |
| <i>lp_3614</i>           | -      | Oxidoreductase                                              | Intracellular         | 33.4  |
| <i>lp_3686</i>           | -      | ABC transporter, substrate binding protein                  | Lipid anchored        | 60.5  |
| At least 2x higher in WT |        |                                                             |                       |       |
| <i>lp_2145</i>           | 3.775  | extracellular protein, DC-SIGN ligand                       | C-terminally anchored | 45.8  |
| <i>lp_3678</i>           | 3.872  | cell surface protein precursor, DUF916 family               | C-terminally anchored | 39.6  |
| <i>lp_0355</i>           | 3.309  | multicopper oxidase (putative)                              | Intracellular         | 56.8  |
| <i>lp_0575</i>           | 13.299 | mannose PTS, EIIAB                                          | Intracellular         | 35.3  |
| <i>lp_0578</i>           | 2.867  | non-ribosomal peptide synthetase NpsA                       | Intracellular         | 602.6 |
| <i>lp_0728</i>           | 13.425 | GroEL chaperonin                                            | Intracellular         | 57.4  |
| <i>lp_0937</i>           | 3.414  | membrane alanine aminopeptidase (aminopeptidase N)          | Intracellular         | 128.2 |
| <i>lp_1043</i>           | 79.973 | ribosomal protein L29                                       | Intracellular         | 7.5   |
| <i>lp_1050</i>           | 19.487 | ribosomal protein S8                                        | Intracellular         | 14.6  |
| <i>lp_1053</i>           | 5.335  | ribosomal protein S5                                        | Intracellular         | 17.3  |
| <i>lp_1054</i>           | 2.682  | ribosomal protein L30                                       | Intracellular         | 6.7   |
| <i>lp_1635</i>           | 5.452  | signal recognition particle protein Ffh                     | Intracellular         | 236.1 |
| <i>lp_1897</i>           | 6.808  | pyruvate kinase                                             | Intracellular         | 43.3  |
| <i>lp_2055</i>           | 3.094  | ribosomal protein S2                                        | Intracellular         | 30.2  |
| <i>lp_2118</i>           | 12.661 | trigger factor; peptidylprolyl isomerase                    | Intracellular         | 49.4  |
| <i>lp_2417</i>           | 2.485  | prophage P2a protein 40; major capsid protein               | Intracellular         | 38.1  |
| <i>lp_2793</i>           | 3.150  | Unknown                                                     | Intracellular         | 76.3  |
| <i>lp_2988</i>           | 7.437  | extracellular zinc metalloproteinase, M10 family (putative) | Intracellular         | 28.1  |
| <i>lp_3170</i>           | 2.172  | phosphoglycerate mutase family protein                      | Intracellular         | 26.1  |

|                |         |                                                                              |                          |       |
|----------------|---------|------------------------------------------------------------------------------|--------------------------|-------|
| <i>lp_3614</i> | 462.380 | Oxidoreductase                                                               | Intracellular            | 33.4  |
| <i>lp_0625</i> | 2.397   | prophage P1 protein 2, mitogenic factor, cell surface lipoprotein            | Lipid anchored           | 41.8  |
| <i>lp_0689</i> | 2.187   | cell surface protein, lipoprotein precursor                                  | Lipid anchored           | 23.1  |
| <i>lp_1072</i> | 43.973  | thiamin biosynthesis lipoprotein ApbE                                        | Lipid anchored           | 34.6  |
| <i>lp_1609</i> | 4.847   | glycine betaine/carnitine/choline ABC transporter, substrate binding protein | Lipid anchored           | 53.9  |
| <i>lp_3686</i> | 69.772  | ABC transporter, substrate binding protein                                   | Lipid anchored           | 60.5  |
| <i>lp_0197</i> | 3.233   | cell surface protein precursor                                               | LPxTG Cell-wall anchored | 105.2 |
| <i>lp_0800</i> | 10.941  | cell surface protein precursor                                               | LPxTG Cell-wall anchored | 226.4 |
| <i>lp_0923</i> | 3.653   | cell surface protein precursor                                               | LPxTG Cell-wall anchored | 83.3  |
| <i>lp_0946</i> | 2.707   | mucus-binding protein (putative)                                             | LPxTG Cell-wall anchored | 37.7  |
| <i>lp_1643</i> | 4.321   | mucus binding protein precursor                                              | LPxTG Cell-wall anchored | 22.2  |
| <i>lp_2925</i> | 9.621   | cell surface protein precursor                                               | LPxTG Cell-wall anchored | 89.5  |
| <i>lp_2940</i> | 11.259  | cell surface protein precursor                                               | LPxTG Cell-wall anchored | 44.3  |
| <i>lp_3114</i> | 8.059   | mucus-binding protein (putative)                                             | LPxTG Cell-wall anchored | 214.8 |
| <i>lp_0802</i> | 4.387   | polar amino acid ABC transporter, substrate binding and permease protein     | Multi-transmembrane      | 52.3  |
| <i>lp_0856</i> | 3.466   | acyltransferase (putative)                                                   | Multi-transmembrane      | 74.4  |
| <i>lp_2914</i> | 2.922   | integral membrane protein                                                    | Multi-transmembrane      | 66.8  |
| <i>lp_0043</i> | 2.774   | serine protease HtrA                                                         | N-terminally anchored    | 43.1  |
| <i>lp_0542</i> | 40.886  | septum formation initiator                                                   | N-terminally anchored    | 15.2  |
| <i>lp_0593</i> | 2.916   | transcriptional attenuator, cell envelope-related, LytR family               | N-terminally anchored    | 43.6  |
| <i>lp_0600</i> | 4.196   | extracellular zinc metalloproteinase, M10 family (putative)                  | N-terminally anchored    | 26.5  |
| <i>lp_0628</i> | 4.558   | prophage P1 protein 5, superinfection exclusion (cell surface N-anchored)    | N-terminally anchored    | 37.9  |
| <i>lp_0688</i> | 2.626   | DNA entry nuclease                                                           | N-terminally anchored    | 36.2  |
| <i>lp_0746</i> | 20.051  | phosphate ABC transporter, substrate binding protein                         | N-terminally anchored    | 31.5  |
| <i>lp_1568</i> | 4.064   | transpeptidase (penicillin binding protein 2B)                               | N-terminally anchored    | 34.8  |
| <i>lp_1751</i> | 31.422  | transpeptidase-transglycosylase (penicillin binding protein 1A)              | N-terminally anchored    | 50.0  |
| <i>lp_2737</i> | 16.042  | cell surface hydrolase, DUF915 family, membrane-bound (putative)             | N-terminally anchored    | 29.7  |
| <i>lp_2809</i> | 9.599   | extracellular protein (putative)                                             | N-terminally anchored    | 23.2  |

|                |        |                                                                                        |                       |       |
|----------------|--------|----------------------------------------------------------------------------------------|-----------------------|-------|
| <i>lp_2812</i> | 4.905  | extracellular protein, membrane-anchored (putative)                                    | N-terminally anchored | 28.5  |
| <i>lp_2845</i> | 13.153 | extracellular transglycosylase (putative)                                              | N-terminally anchored | 30.7  |
| <i>lp_3014</i> | 3.529  | extracellular transglycosylase (putative)                                              | N-terminally anchored | 21.3  |
| <i>lp_3093</i> | 4.562  | muramidase (putative)                                                                  | N-terminally anchored | 89.6  |
| <i>lp_3411</i> | 9.962  | extracellular protein, DUF1002 family                                                  | N-terminally anchored | 34.2  |
| <i>lp_3421</i> | 3.818  | extracellular protein, gamma-D-glutamate-meso-diaminopimelate muropeptidase (putative) | N-terminally anchored | 36.8  |
| <i>lp_0092</i> | 29.929 | ABC transporter, substrate binding protein, oligopeptide                               | Secretory(released)   | 59.8  |
| <i>lp_0141</i> | 6.321  | extracellular protein                                                                  | Secretory(released)   | 28.6  |
| <i>lp_0302</i> | 3.404  | extracellular transglycosylase (putative)                                              | Secretory(released)   | 26.3  |
| <i>lp_0304</i> | 5.058  | extracellular transglycosylase (putative)                                              | Secretory(released)   | 22.1  |
| <i>lp_0924</i> | 4.442  | extracellular protein                                                                  | Secretory(released)   | 68.6  |
| <i>lp_1697</i> | 19.569 | adherence protein, chitin-binding domain                                               | Secretory(released)   | 31.6  |
| <i>lp_2541</i> | 2.890  | ABC transporter, substrate binding protein                                             | Secretory(released)   | 35.0  |
| <i>lp_2978</i> | 2.253  | extracellular protein                                                                  | Secretory(released)   | 25.5  |
| <i>lp_3189</i> | 3.826  | serine-type D-Ala-D-Ala carboxypeptidase                                               | Secretory(released)   | 47.0  |
| <i>lp_3412</i> | 4.978  | extracellular protein                                                                  | Secretory(released)   | 118.7 |
| <i>lp_3414</i> | 3.493  | extracellular protein                                                                  | Secretory(released)   | 27.4  |
| <i>lp_3676</i> | 12.665 | extracellular protein                                                                  | Secretory(released)   | 56.8  |
| <i>lp_2960</i> | 4.815  | lipase/esterase, subfamily of SGNH-hydrolases                                          | transmembrane         | 25.5  |

<sup>a</sup> FDR Relative abundances were calculated by the ratio of Label-free quantitation (LFQ) of detected peptides in wild type and *lgt* mutant.
